# Supplementary material for: Cordyceps sinensis-mediated biotransformation of notoginsenoside R1 into 25-OH-20(S/R)-R2 with elevated cardioprotective effect against DOX-induced cell injury
Source: Royal Society of Chemistry journal article supplement (doi:10.1039/d2ra01470j), 2022-01-01

Electronic Supplementary Material (ESI) for RSC Advances.  
This journal is © The Royal Society of Chemistry 2022

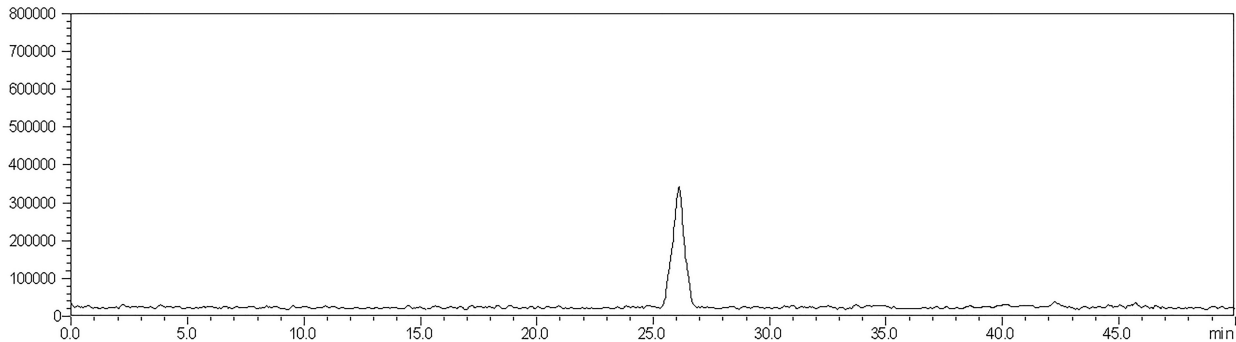

Supplement: d2ra01470j3.pdf [file d2ra01470j3.pdf]
