# Supplementary material for: Cordyceps sinensis-mediated biotransformation of notoginsenoside R1 into 25-OH-20(S/R)-R2 with elevated cardioprotective effect against DOX-induced cell injury
Source: Royal Society of Chemistry journal article supplement (doi:10.1039/d2ra01470j), 2022-01-01
Supplement: d2ra01470j9.pdf [file d2ra01470j9.pdf]

## Supporting Information

***Cordyceps Sinensis*-mediated biotransformation of notoginsenoside R1 into 25-OH-20(S/R)-R2 with elevated cardioprotective effect against DOX-induced cell injury**

**Jishuang Liu <sup>a</sup>, Yu Xin <sup>a</sup>, Zhidong Qiu <sup>a</sup>, Qi Zhang <sup>a</sup>, Tianzhu He <sup>b</sup>, Ye Qiu <sup>a\*</sup> and Weinan Wang <sup>a\*</sup>**

### **Affiliation**

<sup>a</sup>. School of pharmaceutical sciences, Changchun University of Chinese Medicine, Changchun, Jilin Province, China.

<sup>b</sup>. School of Basic Medical Sciences, Changchun University of Chinese Medicine, Changchun, Jilin Province, China.

### **Correspondence 1**

***Dr. Weinan Wang***

Phone: 086-0431-86172225

Email: cnweinanwang@163.com

### **Correspondence 2**

***Dr. Ye Qiu***

Phone: 086-0431-86172211

Email: ccyeqiu@163.com

## Contents

**Fig. 1S.** HPLC-MS chromatogram of compound **1**.

**Fig. 2S.** HPLC-MS chromatogram of compound **2**.

**Fig. 3S.**  $^1\text{H}$ -NMR spectrum of compound **1** (500 MHz, Pyridine- $d_5$ ).

**Fig. 4S.**  $^{13}\text{C}$ -NMR spectrum of compound **1** (125 MHz, Pyridine- $d_5$ ).

**Fig. 5S.** HSQC spectrum of compound **1**.

**Fig. 6S.** HMBC spectrum of compound **1**.

**Fig. 7S.**  $^{13}\text{C}$ -NMR spectrum of compound **2** (125 MHz, Pyridine- $d_5$ ).

## Purity analysis of compound 1 and 2

The purity of compound 1 and 2 was evaluated via HPLC-MS analysis. Separation of the products on HPLC was accomplished by an Agilent SB-Aq C18 column (250 mm×4.6 mm, 5  $\mu$ m) with a flow rate of 1.0 mL/min. The mobile phase consisted of A (0.1% formic acid in H<sub>2</sub>O) and B (0.1% formic acid in acetonitrile). The gradient elution procedure was operated as below: 0-30 min 20% B, 30-35 min 20%-95% B, 35-40 min 95% and 40-50 min 95%-20%B. The column temperature was set to 30 °C. The injection volume was 10  $\mu$ L for either qualification or quantification experiments. Relative quantification was performed on a triple quadrupole mass spectrometer (Shimadzu LC-MS 8040, Japan) and the settings are identical to what described in the main text.

The purity of both compound 1 and 2 was greater than 95%, calculated by area normalization (Fig. S1 and S2).

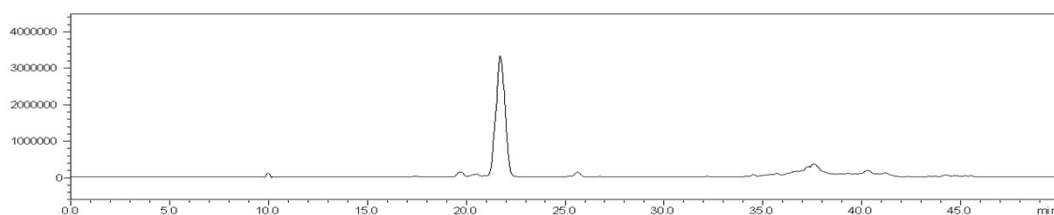

**Fig. 1S.** HPLC-MS chromatogram of compound 1.

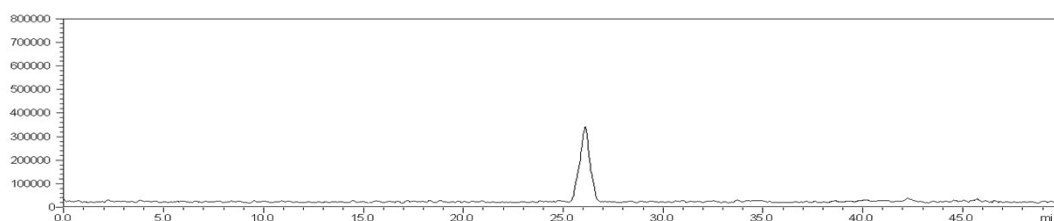

**Fig. 2S.** HPLC-MS chromatogram of compound 2.

## NMR analysis of compound 1 and 2

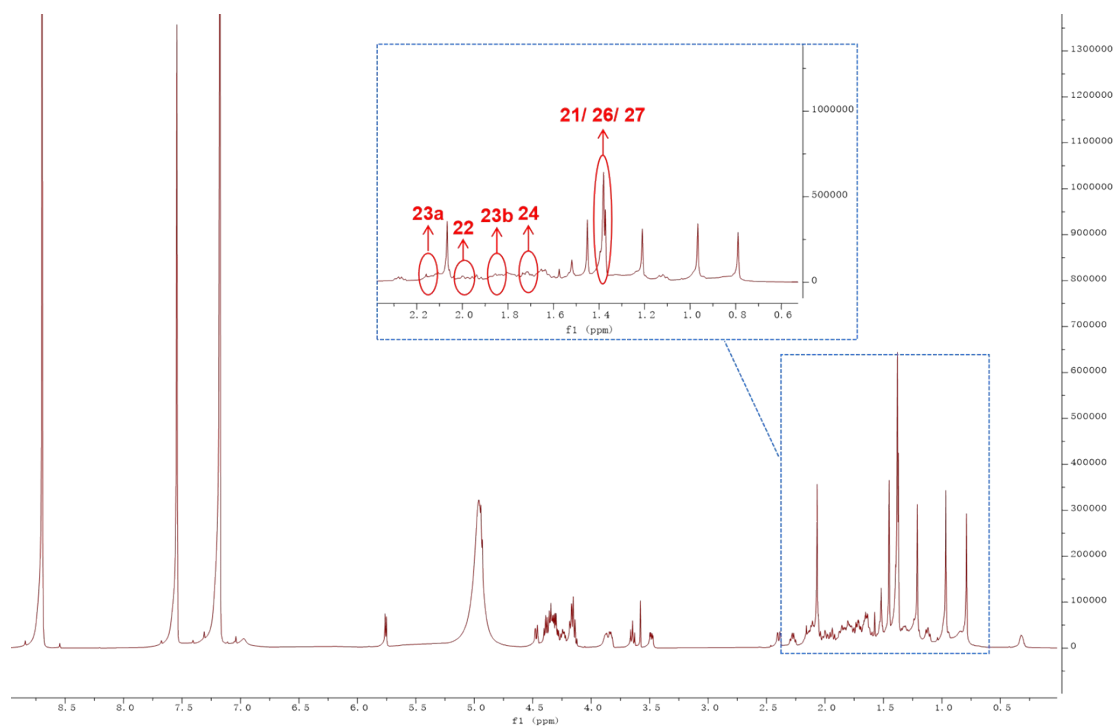

**Fig. 3S.** <sup>1</sup>H-NMR spectrum of compound 1 (500 MHz, Pyridine-*d*<sub>5</sub>).

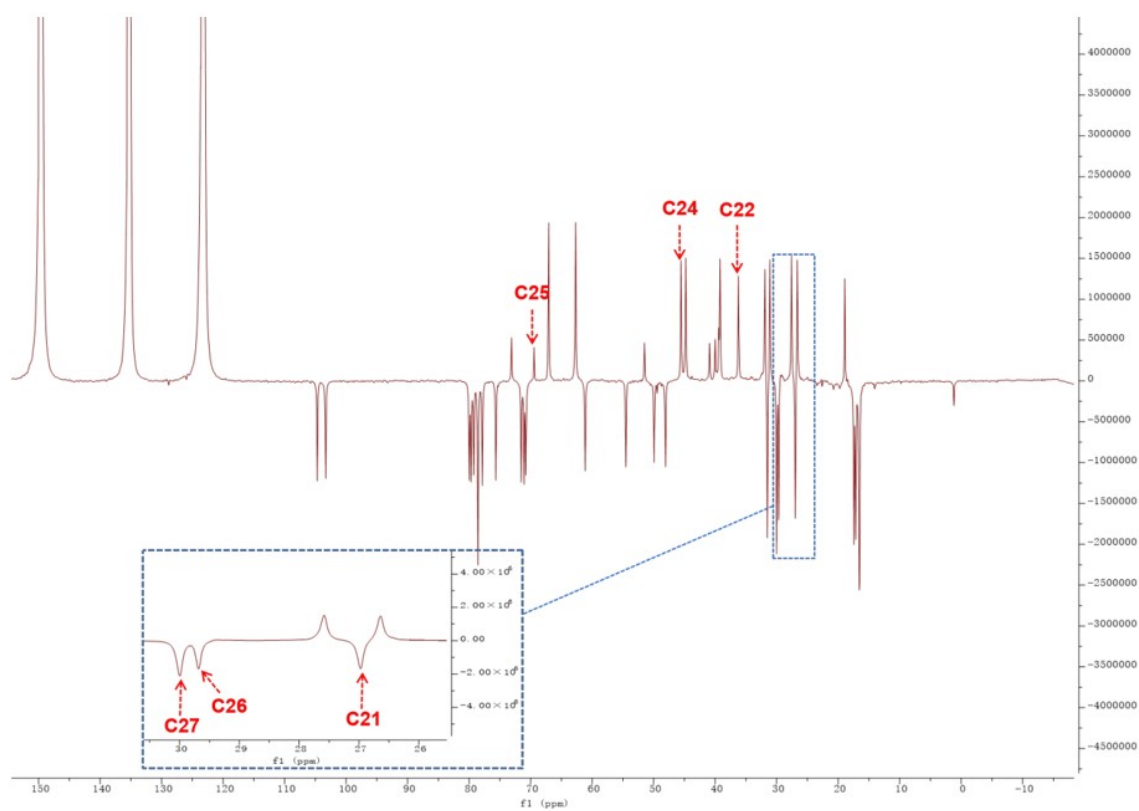

**Fig. 4S.** <sup>13</sup>C-NMR spectrum of compound 1 (125 MHz, Pyridine-*d*<sub>5</sub>).

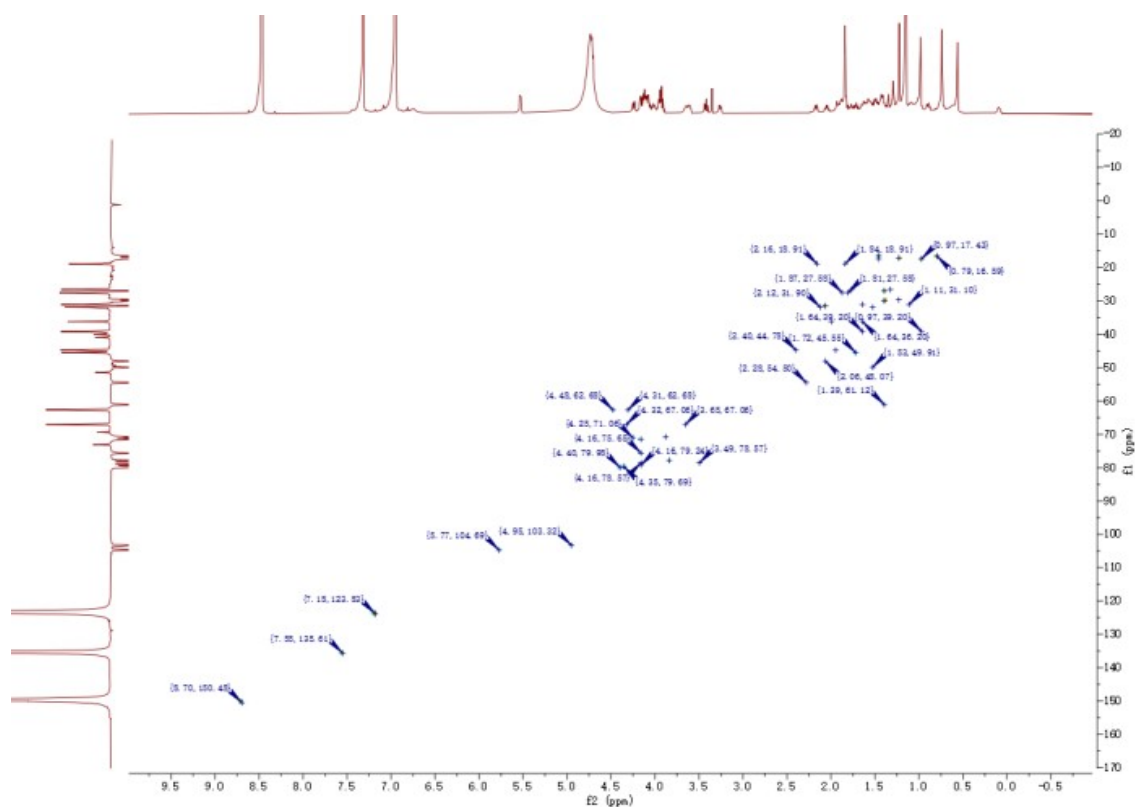

Fig. 5S. HSQC spectrum of compound 1.

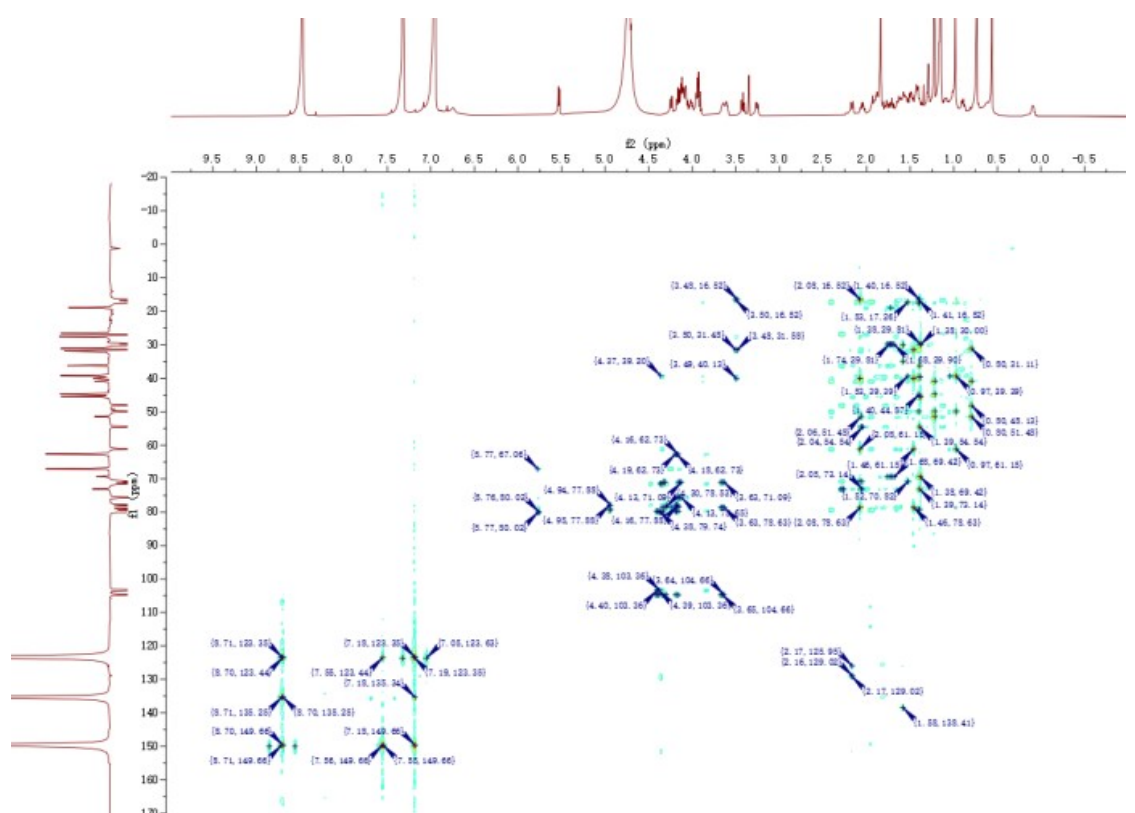

Fig. 6S. HMBC spectrum of compound 1.

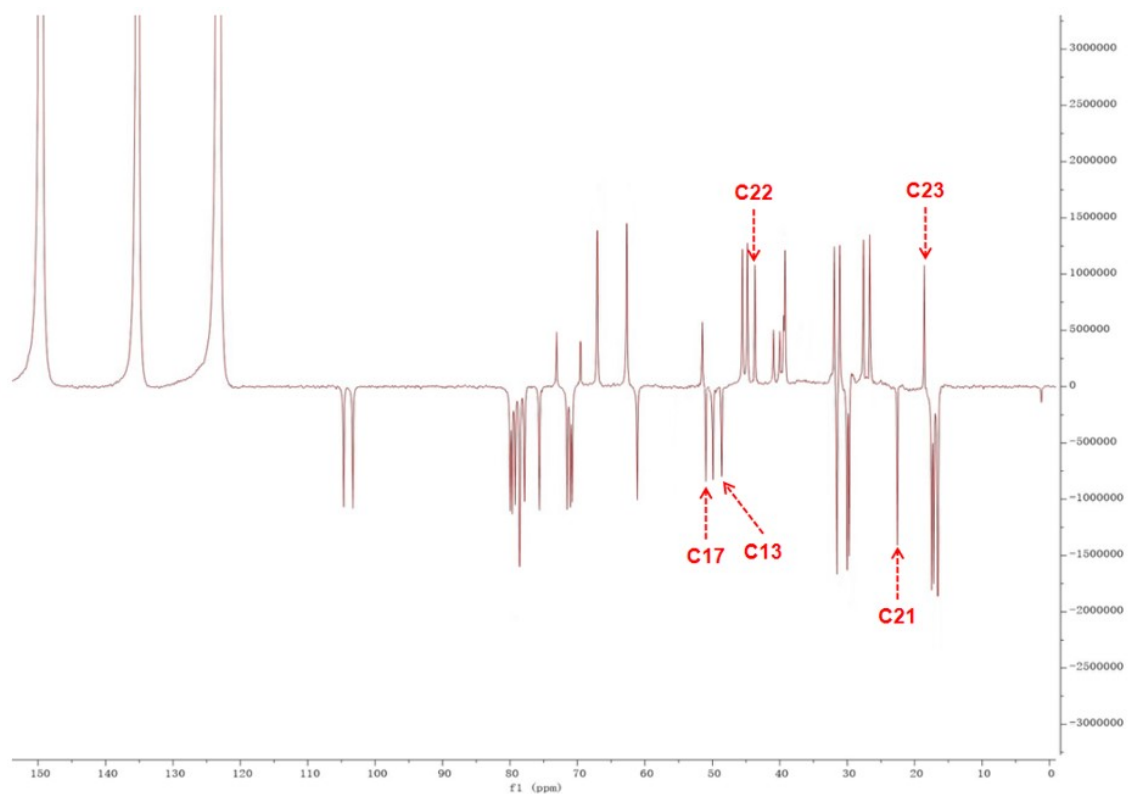

**Fig. 7S.**  $^{13}\text{C}$ -NMR spectrum of compound 2 (125 MHz, Pyridine- $d_5$ ).
