# Supplementary figures and images for: Cordyceps sinensis-mediated biotransformation of notoginsenoside R1 into 25-OH-20(S/R)-R2 with elevated cardioprotective effect against DOX-induced cell injury
Source: Royal Society of Chemistry journal article supplement (doi:10.1039/d2ra01470j), 2022-01-01

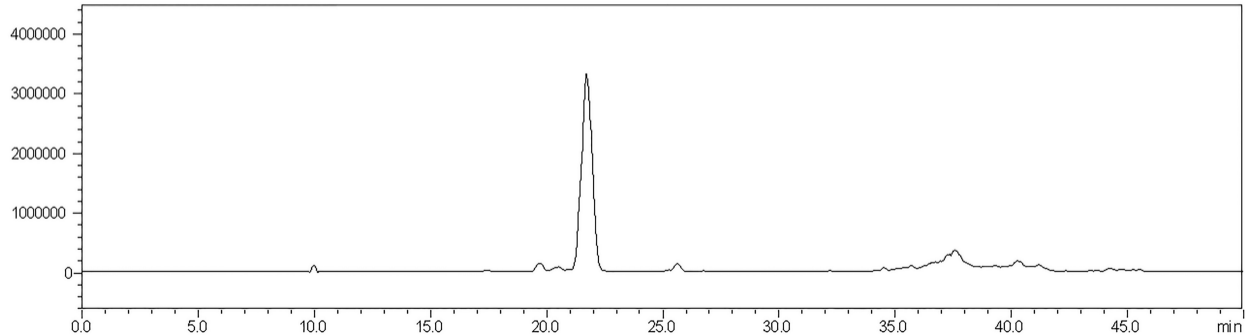

Supplement: d2ra01470j2.pdf [file d2ra01470j2.pdf]

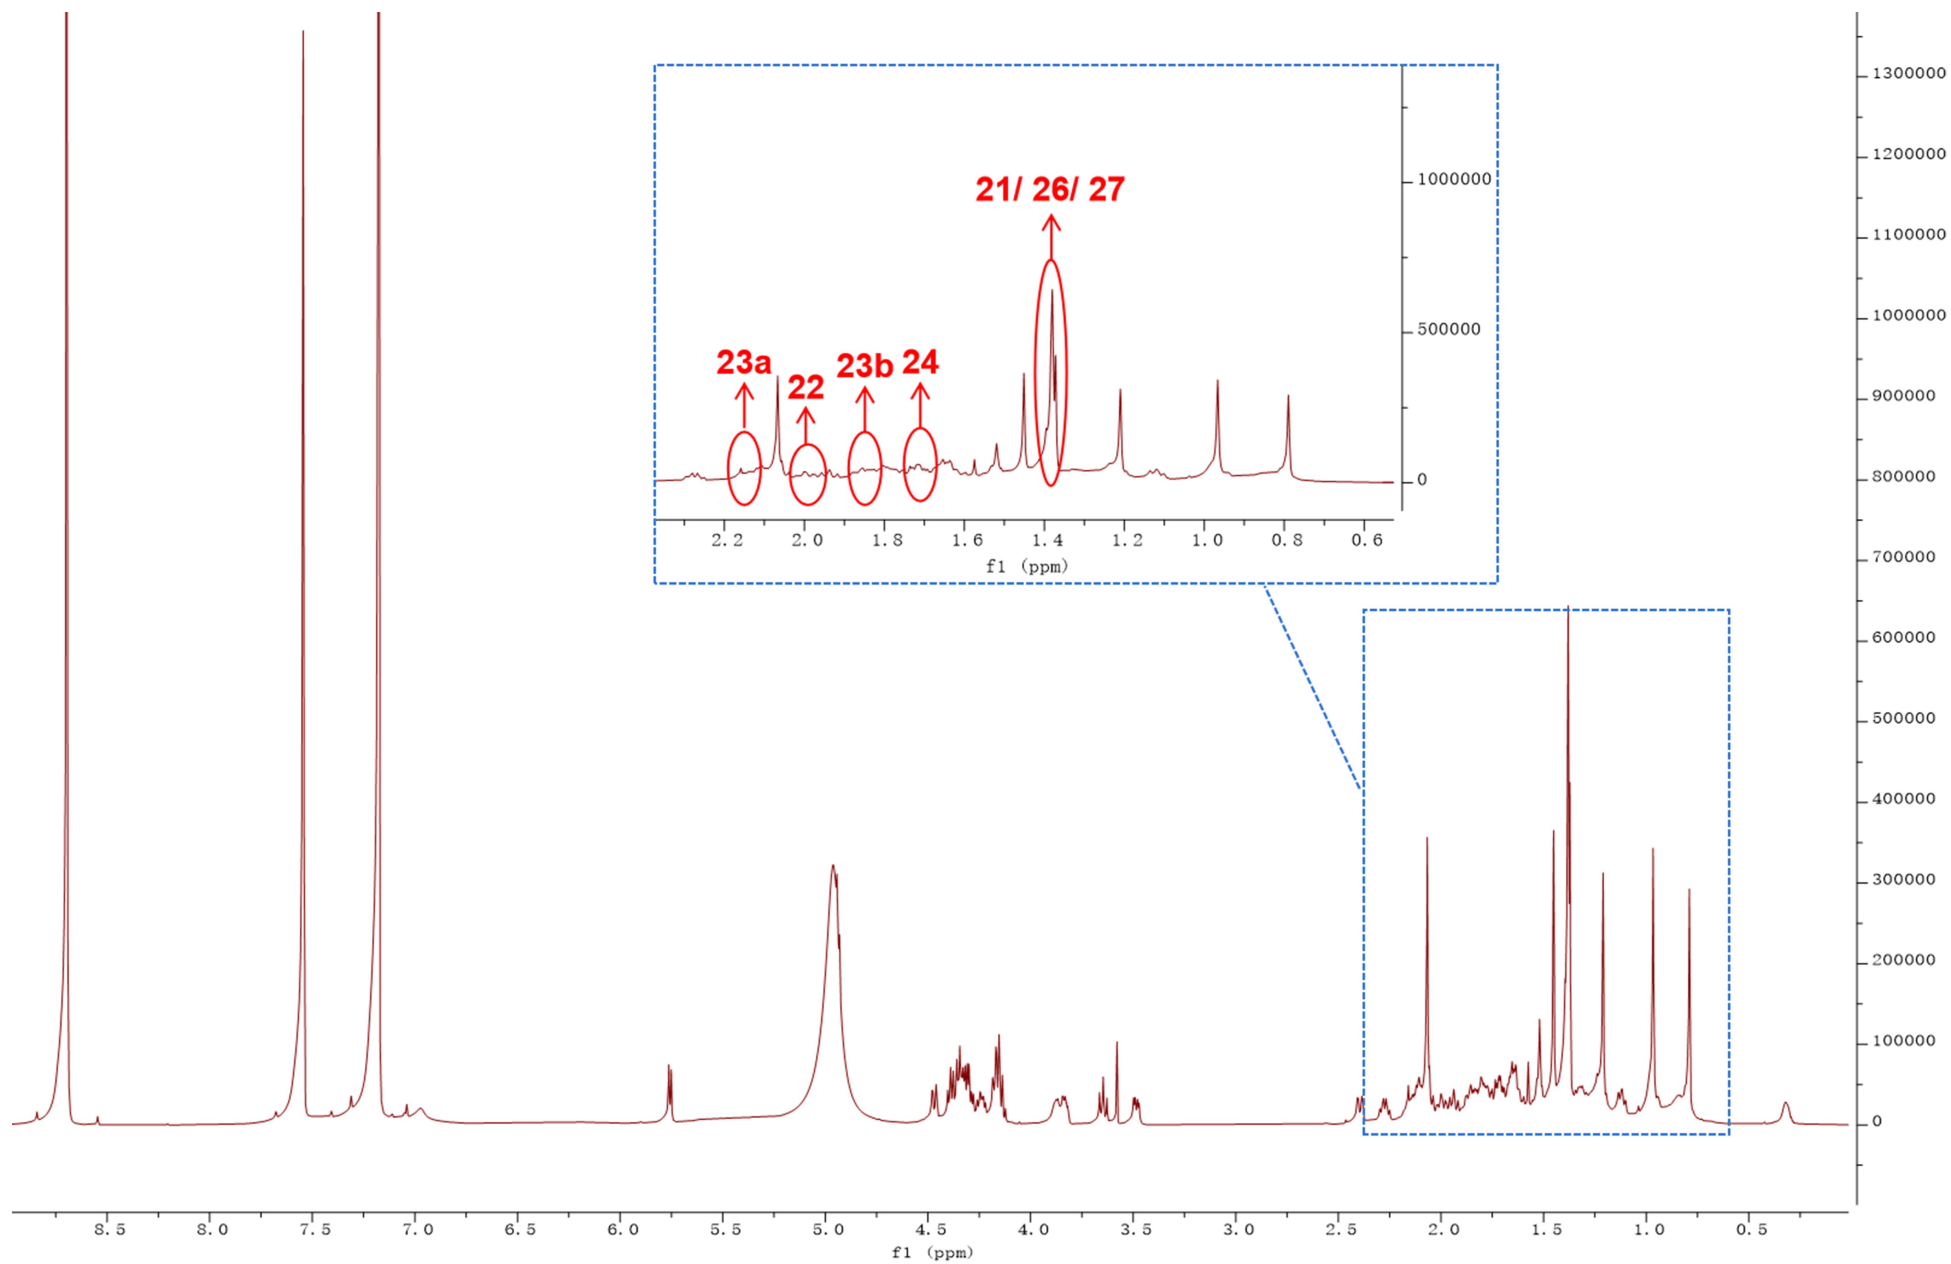

Supplement: d2ra01470j4.pdf [file d2ra01470j4.pdf]

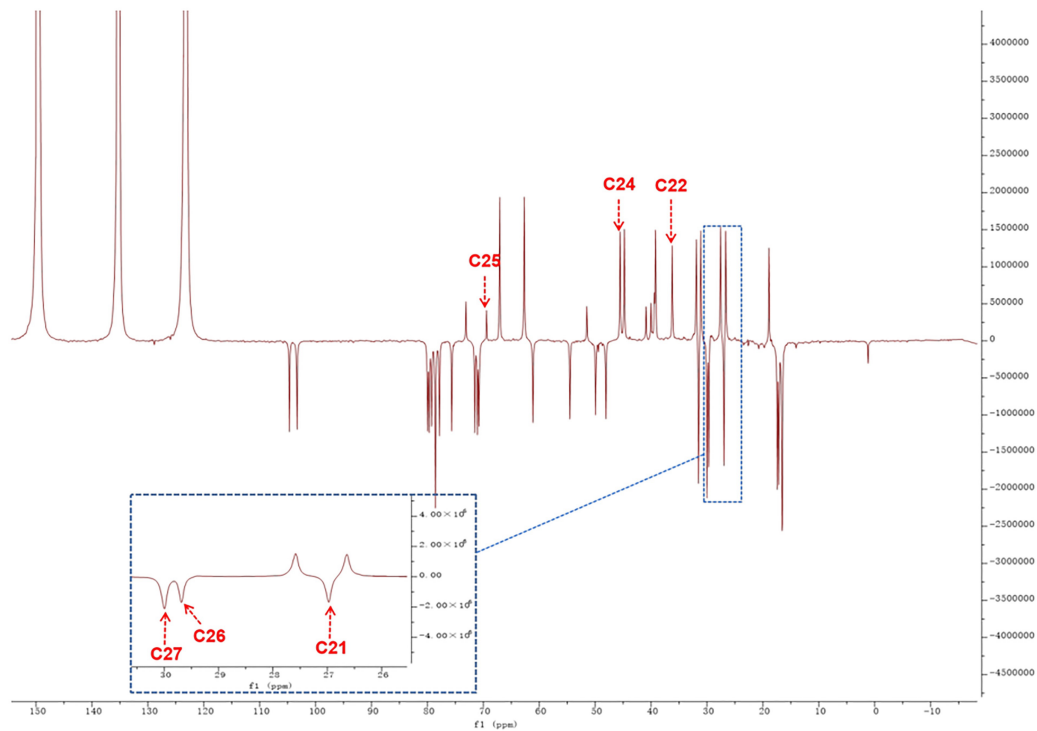

Supplement: d2ra01470j5.pdf [file d2ra01470j5.pdf]

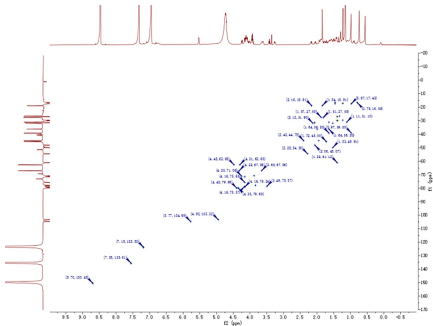

Supplement: d2ra01470j6.pdf [file d2ra01470j6.pdf]

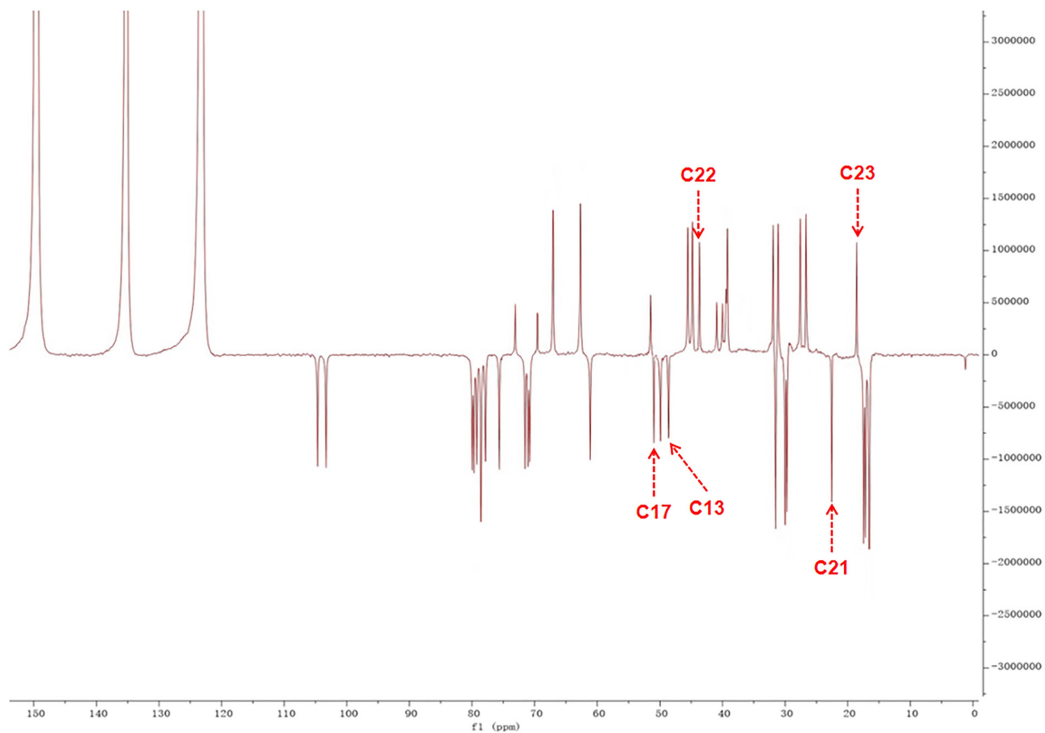

Supplement: d2ra01470j8.pdf [file d2ra01470j8.pdf]
